# Supplementary material for: Intravital imaging strategy FlyVAB reveals the dependence of Drosophila enteroblast differentiation on the local physiology
Source: PubMed Central journal article supplement (PMC8546075; doi:10.1038/s42003-021-02757-z), 2021-10-25
Supplement: 42003_2021_2757_MOESM2_ESM.pdf [file 42003_2021_2757_MOESM2_ESM.pdf]

## Supplementary materials:

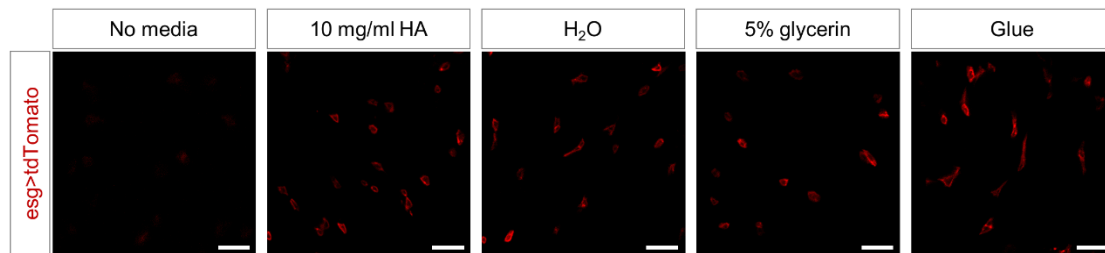

**Supplementary Figure 1. The test of mounting media.** The adult *Drosophila* midgut was visible using 10 mg/ml HA, H<sub>2</sub>O, 5% glycerin or glue. Genotype: *esg-Gal4 10×UAS-myr:tdTomato*. All scale bars are 20  $\mu$ m.

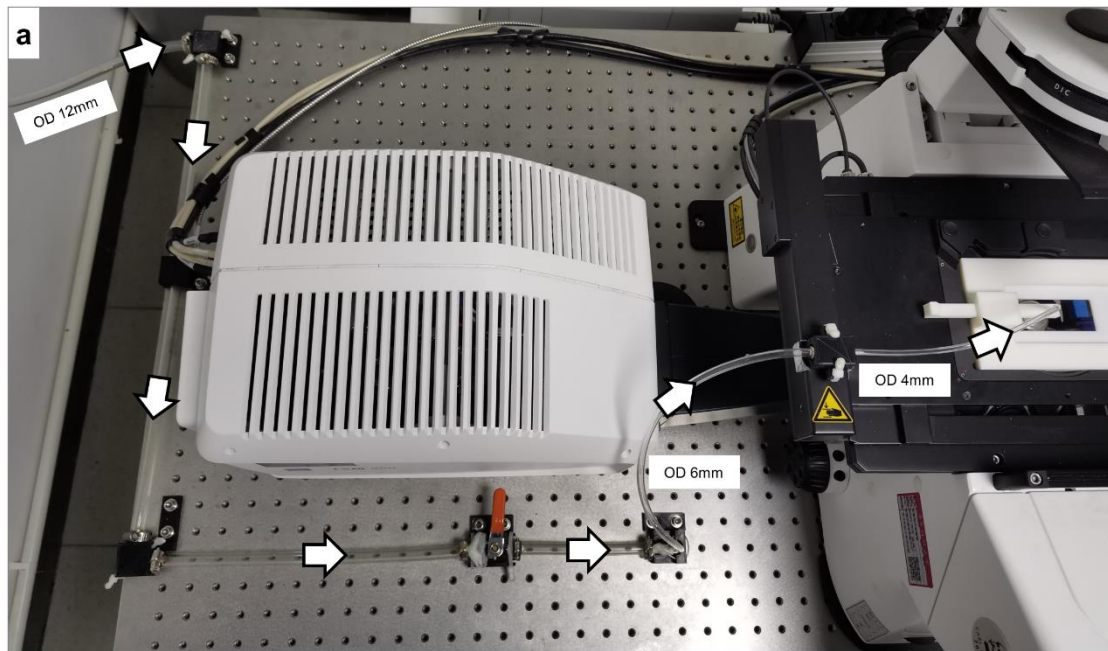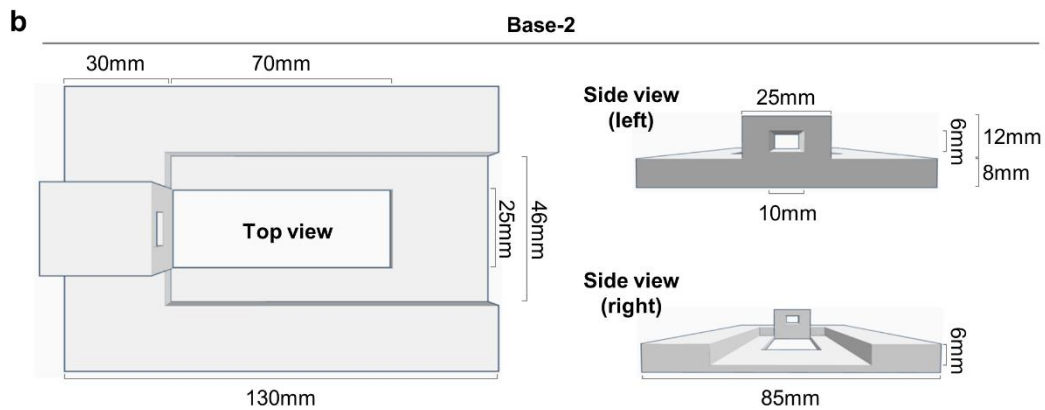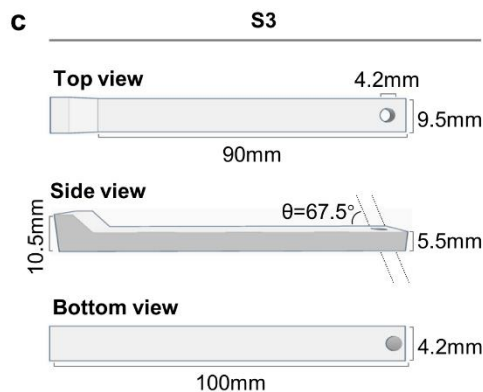

**Supplementary Figure 2. Design of the FlyVAB (P2) and (P3).** **a** Representative image of the FlyVAB (P2) from the top. FlyVAB (P2) was designed as a CO<sub>2</sub> delivery system to perform *Drosophila* anesthesia. The white arrows show the direction of CO<sub>2</sub> flow. The size of three types of PU tubing is indicated. **b, c** Exploded view drawing of the FlyVAB (P3). FlyVAB (P3) consists of the Base-2 (**b**) and S-3 (**c**). At the bottom of the Base-2, a window was present to place the 20× objective of the microscope, and a groove to hold FlyVAB (P1). The removable S3 was placed through a small window on the left side of Base-2. The punching was designed in S3 to hold the PU

tubing. An angle of 67.5 degree was present between the punching and the horizontal line.

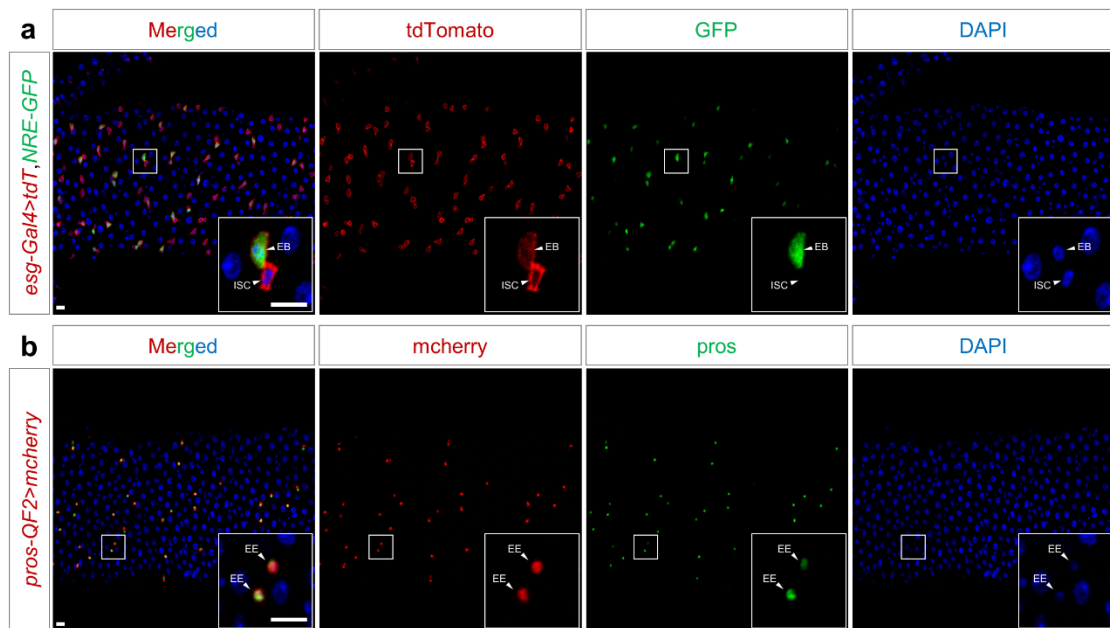

**Supplementary Figure 3. Identification of ISCs, EBs, and EEs in fixed tissues. a** Immunostaining of GFP after dissection at 5 days after eclosion. An ISC and an EB are indicated by white arrowheads (the square is enlarged in the lower right corner). **b** Immunostaining of Pros after dissection at 5 days after eclosion. An EE is indicated by a white arrowhead (the square is enlarged in the lower right corner). Genotype in **a**: *esg-Gal4 10×UAS-myr:tdTomato, NRE-GFP*. Genotype in **b**: *pros-QF2 20×QUAS-6xmcherry*. All scale bars are 10  $\mu$ m in **a-b**.

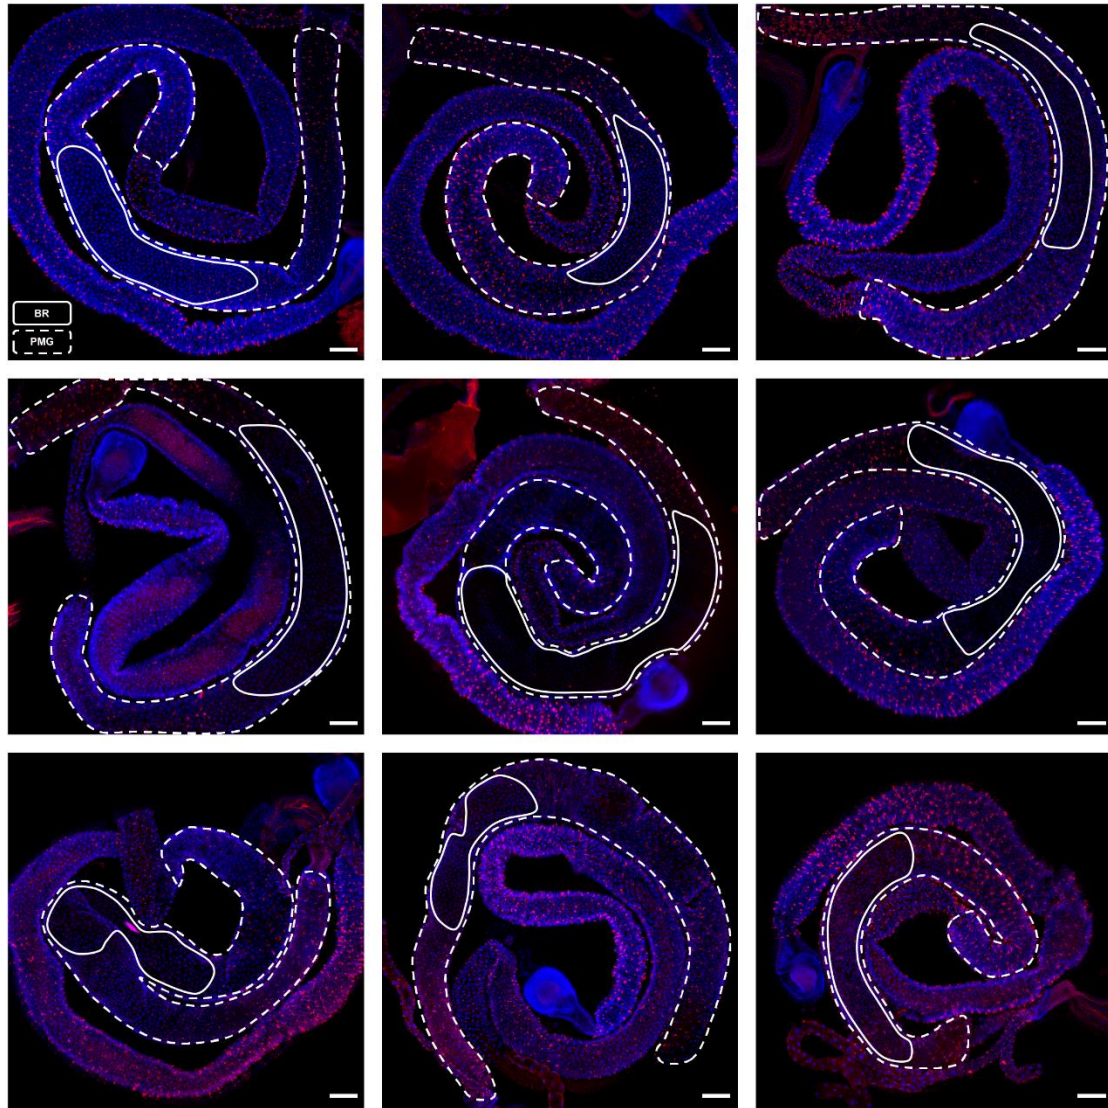

**Supplementary Figure 4. Determination of the visualized region in the midgut by photobleaching in nine additional flies.** Gut samples were subjected to photobleaching, then dissected, fixed, and stained with DAPI (blue). BR: bleached region (solid line). PMG: posterior midgut (dashed line). Genotype: *esg-Gal4 10×UAS-myr:tdTomato*.

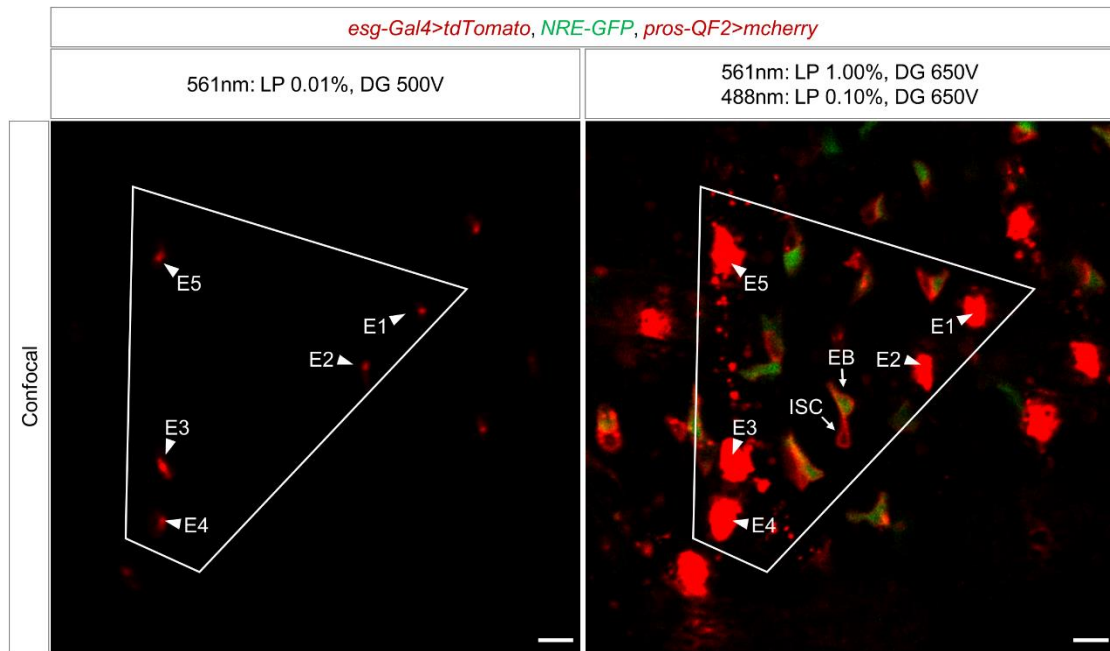

**Supplementary Figure 5. Visualization of ISCs, EBs and EEs in the same fly.** Low laser power (LP) and low digital gain (DG) under the 561 nm laser line identified only EEs (*pros-QF2>mcherry*, E1-E5, solid line). Normal LP and DG under 488 nm and 561 nm laser line identified ISCs (*esg-Gal4>tdTomato*), EBs (*esg-Gal4>tdTomato, NRE-GFP*), and EEs, but EEs were overexposed. Genotype: *esg-Gal4 10×UAS-myr:tdTomato, NRE-GFP; pros-QF2 20×QUAS-6×mcherry*. All scale bars in a and b are 10  $\mu$ m.

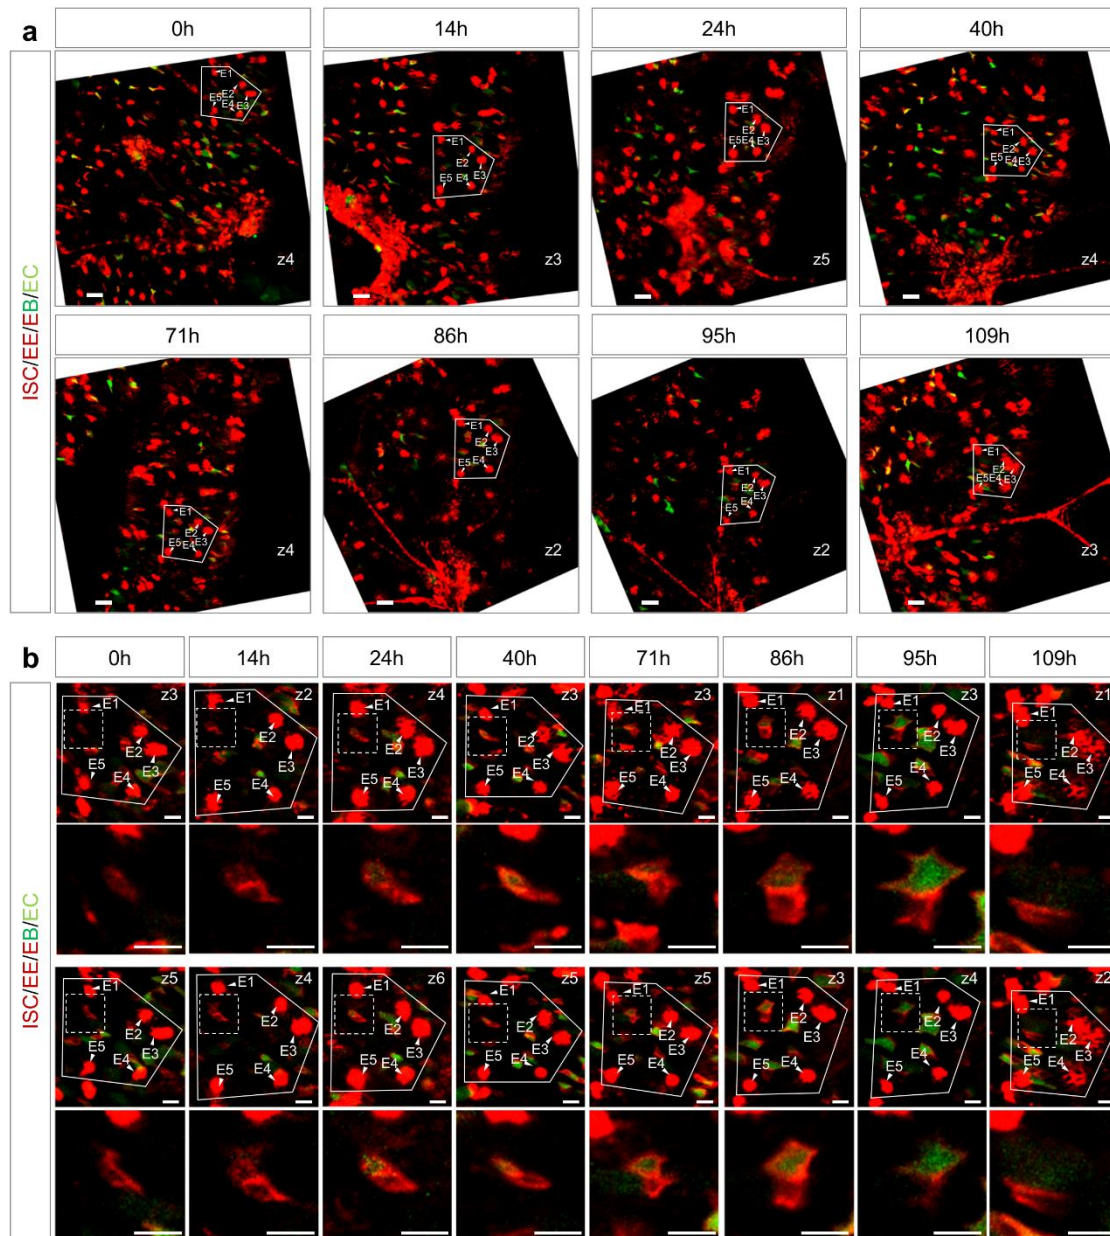

**Supplementary Figure 6. Additional images of Figure 5a. a** Full view of the images. Individual images were rotated to compare the EE cell pattern (E1-E5, solid line) over time. The z-section of each image is indicated in the lower right corner. Scale bars are 20  $\mu\text{m}$ . **b** Images of two additional z-sections. Z-sections are indicated in the upper right corner. The region of interest (dashed square) at each individual z-section is enlarged in the second and fourth row. Scale bars are 10  $\mu\text{m}$ . Genotype: *esg-Gal4 10*  $\times$  *UAS-myr:tdTomato*, *NRE-GFP*; *pros-QF2 20*  $\times$  *QUAS-6*  $\times$  *mcherry*.

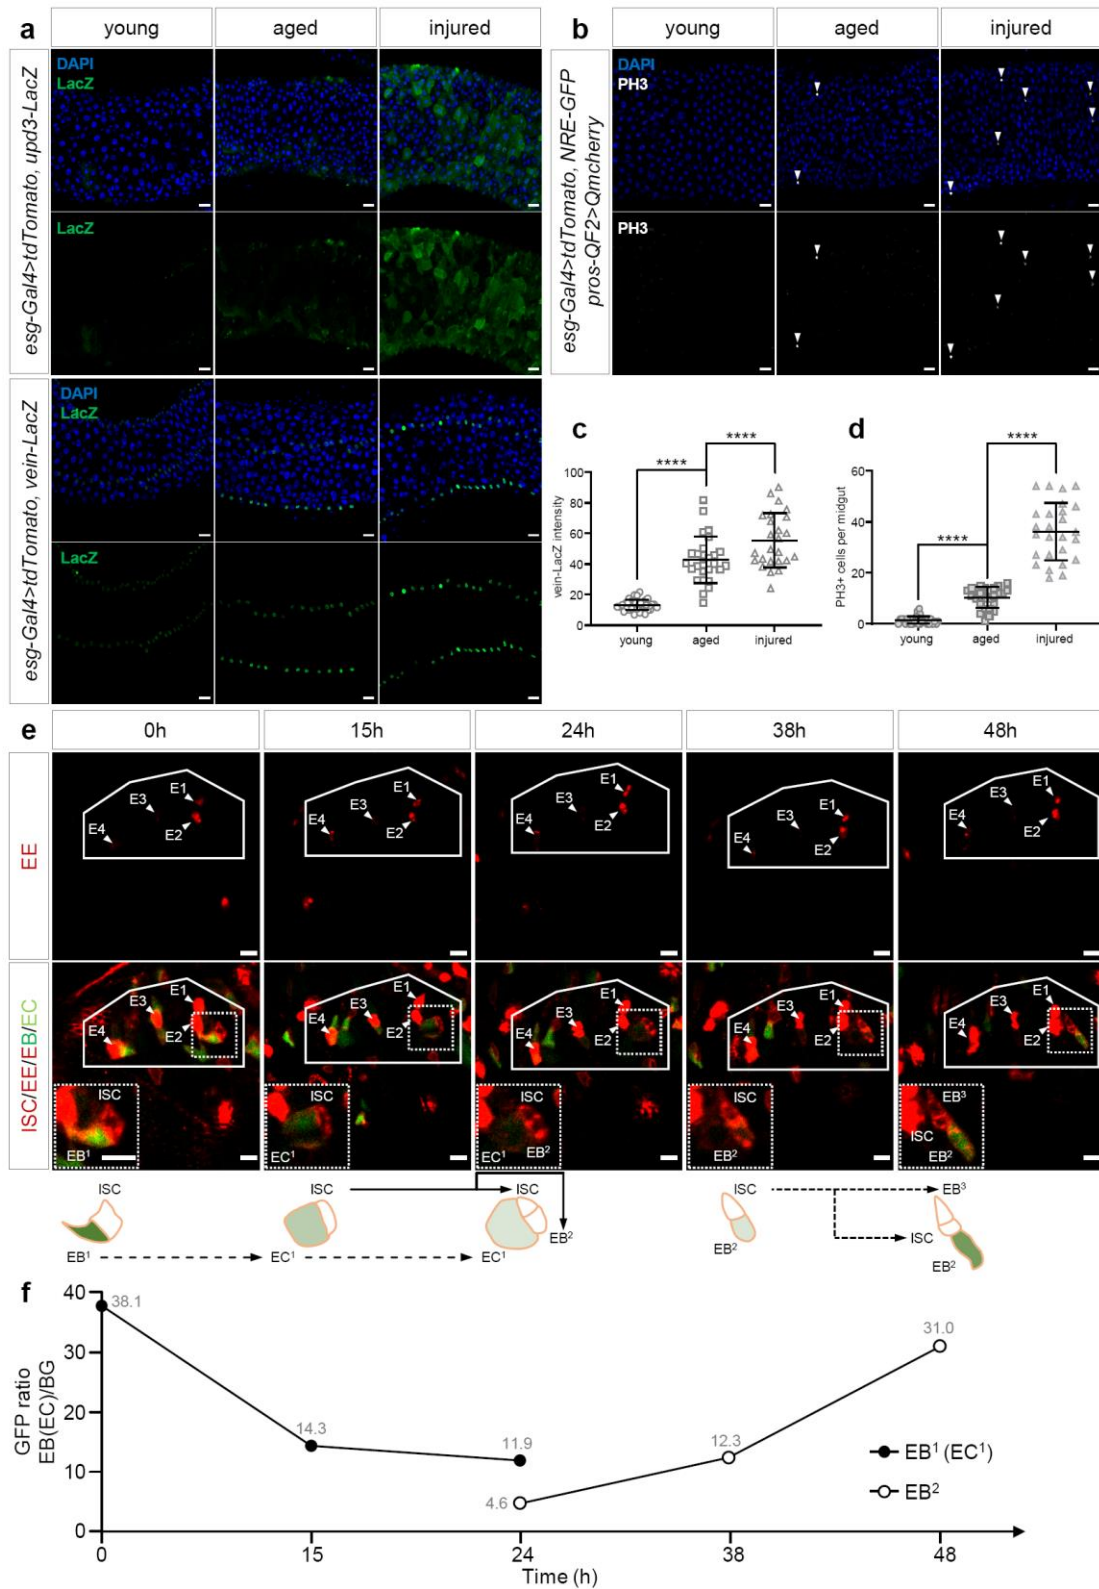

**Supplementary Figure 7. 14 days old intestines were in a mild hyperplastic status and *in vivo* tracking of ISCs and EBs upon local EC renewal.** **a** Representative images of *upd3-lacZ*, *vein-lacZ* staining in young (7 days), aged (14 days) and injured (1 day after bleomycin treatment) flies. Genotype: *esg-Gal4 10 × UAS-myr:tdTomato/upd3-lacZ* or *vn-lacZ*. **b** Representative images of PH3 staining in young, aged and injured flies. White arrowhead: PH3<sup>+</sup> cell. Genotype: *esg-Gal4 10 ×*

*UAS-myr:tdTomato, NRE-GFP; pros-QF2 20×QUAS-6×mcherry*. **c** Quantification of the *vein-lacZ* intensity in **a**. Results are shown as mean  $\pm$  SD. **d** Quantification of PH3+ cells per midgut in young, aged and injured flies. Results are shown as mean  $\pm$  SD. **e** Representative images of ISC division and differentiation with local EC renewal. Using the EE pattern (E1-E4, solid line, first row), an ISC-EB pair (ISC and EB<sup>2</sup>, the dashed square is enlarged in the lower left corner) was tracked at 5 time points over 48 h. An EB-EC transition (EB<sup>1</sup> to EC<sup>1</sup>) was identified over 24 h. The ISC divided once to generate an ISC and an EB<sup>2</sup> along with the EC<sup>1</sup> generation. Shortly afterwards, ISC divided again to generate an ISC and an EB<sup>3</sup>. Genotype: *esg-Gal4 10×UAS-myr:tdTomato, NRE-GFP; pros-QF2 20×QUAS-6×mcherry*. **f** Quantification of GFP ratio in EB<sup>1</sup> (EC<sup>1</sup>) and EB<sup>2</sup>. The value of GFP ratio is indicated at each time point. Scale bars are 20  $\mu$ m in **a** and **b**, 10  $\mu$ m in **e**.
