# Supplementary material for: Intravital imaging strategy FlyVAB reveals the dependence of Drosophila enteroblast differentiation on the local physiology
Source: PubMed Central journal article supplement (PMC8546075; doi:10.1038/s42003-021-02757-z), 2021-10-25
Supplement: 42003_2021_2757_MOESM3_ESM.pdf [file 42003_2021_2757_MOESM3_ESM.pdf]

## Description of Additional Supplementary Files

**File name:** Supplementary Movie 1.

**Description:** Video protocol of the FlyVAB method.

**File name:** Supplementary Movie 2.

**Description:** Flies that were subjected to one-time squeezing had a similar amount of deposits.

**File name:** Supplementary Movie 3.

**Description:** Timelapse movie of calcium signal in 10 min. Red, esg-Gal4 driven tdTomato. Green, esg-Gal4 driven GCaMP.
